# Supplementary material for: PIF-Mediated Sucrose Regulation of the Circadian Oscillator is Light Quality and Temperature Dependent
Source: Genes (Basel). 2018 Dec 13;9(12):628. doi: 10.3390/genes9120628 (PMC6316277; doi:10.3390/genes9120628)
Supplement: Supplementary file 1 [file genes-09-00628-s001.pdf]

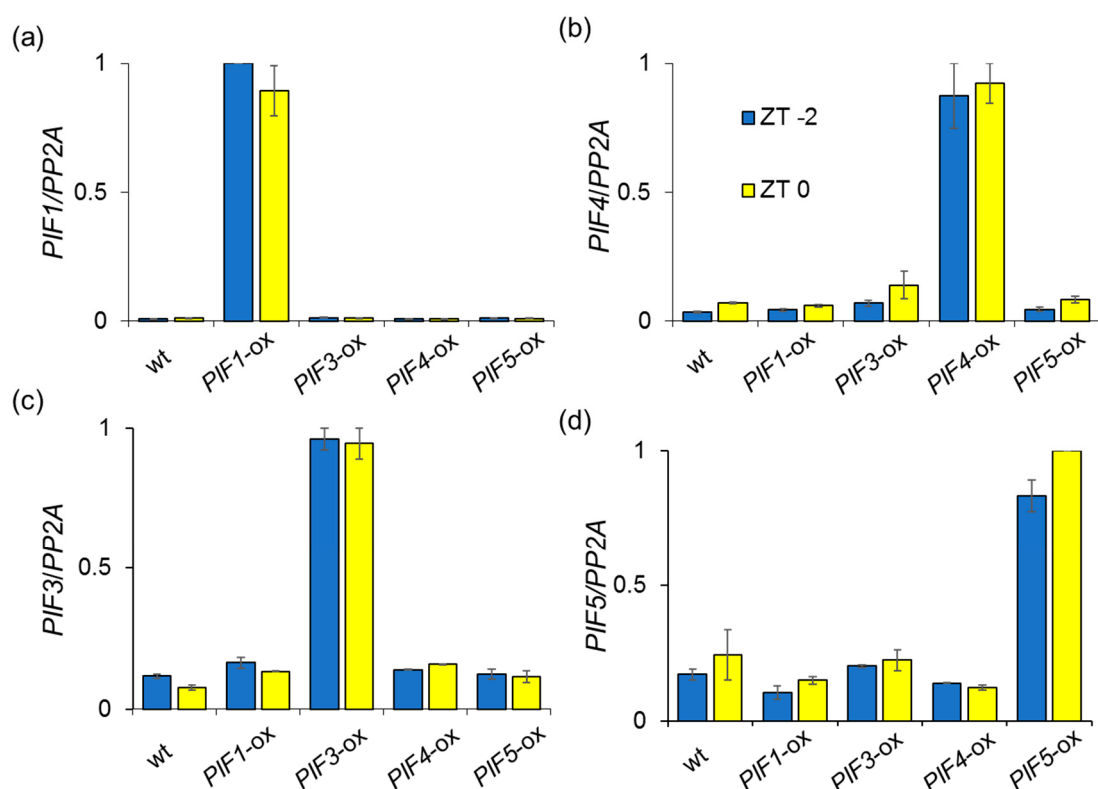

**Figure S1.** The effects of *PIF*-overexpression on levels of individual PIFs. *PIF*-overexpressing and wt plants were entrained for 8 days in 14 h: 10 h, light: dark, white light ( $100 \mu\text{mol m}^{-2} \text{s}^{-1}$ ) before being transferred to LL. Samples were taken at ZT-2 and ZT0 (46 and 48 hours at LL, respectively). The average expression of (a) *PIF1*, (b) *PIF4*, (c) *PIF3* and (d) *PIF5* with SEM from two independent biological repeats is shown.

Supplementary table S1: Primers, used for RT-PCR.

|             |                        |                       |
|-------------|------------------------|-----------------------|
| <i>PIF1</i> | gccaccactactgatgaaactg | atgaacttcagcagcacgag  |
| <i>PIF3</i> | gacggcgtgataggatcaac   | catcgaagctttgtccacct  |
| <i>PIF4</i> | aagtcgaaccaacgatcagg   | ttgcaaagccttcattctctc |
| <i>PIF5</i> | cagaccagaagatgaattagt  | acggttctctacgagcttgg  |
| <i>PP2A</i> | aaacttgctgagggagaaa    | ggaaaatcccatgctgat    |
